# Supplementary material for: Treatment of atopic dermatitis with upadacitinib: adcare single center experience
Source: PubMed Central journal article supplement (PMC11061355; doi:10.3389/fmed.2024.1385720), 2024-04-17

# Diagram 1

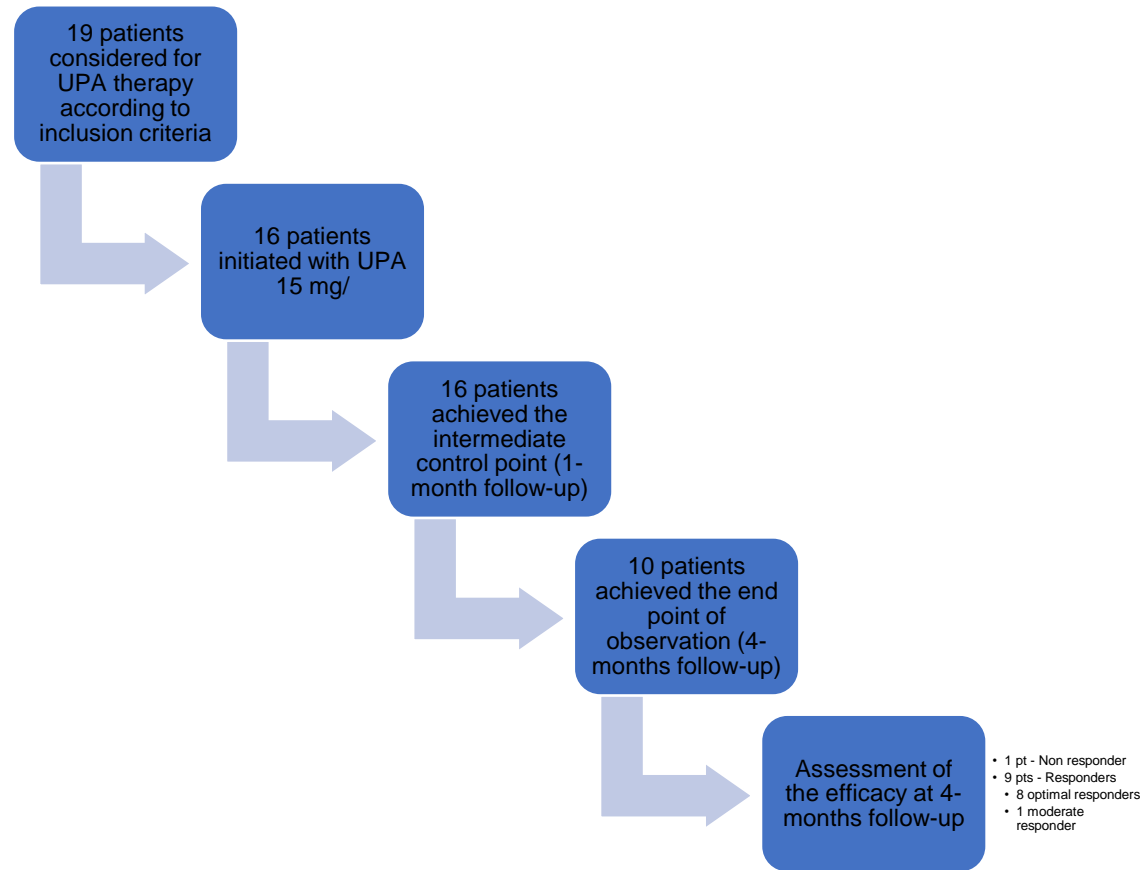

Supplement: Data_Sheet_1.pdf [file Data_Sheet_1.pdf]
